# Supplementary material
Source: PubMed Central journal article supplement (PMC10270464)
Supplement: ebmental-2019-300088supp001.pdf [file ebmental-2019-300088supp001.pdf]

**Supplemental Material 1. Search strategy and results from each database (Last search August 22, 2018)**

PubMed hits:178

(adhd OR adhd OR attention deficit disorder with hyperactivity OR minimal brain disorder OR syndrome hyperkinetic OR hyperkinetic syndrome OR hyperactivity disorder OR hyperactive child syndrome OR childhood hyperkinetic syndrome OR attention deficit hyperactivity disorders OR attention deficit hyperactivity disorder OR adhd attention deficit hyperactivity disorder OR addh OR overactive child syndrome OR attention deficit hyperkinetic disorder OR hyperkinetic disorder OR attention deficit disorder hyperactivity OR attention deficit disorder hyperactivity OR child attention deficit disorder OR hyperkinetic syndromes OR syndromes hyperkinetic OR hyperkinetic syndrome childhood) AND (neurofeedback OR neuro feedback OR "EEG biofeedback" OR neuro therapy OR neurotherapy OR SCP OR "slow cortical potentials") AND (Methylphenidate\* OR methylphenidate\* OR Ritalin OR ritalin)

Web of Science :120

TOPIC: (adhd OR adhd OR attention deficit disorder with hyperactivity OR minimal brain disorder OR syndrome hyperkinetic OR hyperkinetic syndrome OR hyperactivity disorder OR hyperactive child syndrome OR childhood hyperkinetic syndrome OR attention deficit hyperactivity disorders OR attention deficit hyperactivity disorder OR adhd attention deficit hyperactivity disorder OR addh OR overactive child syndrome OR attention deficit hyperkinetic disorder OR hyperkinetic disorder OR attention deficit disorder hyperactivity OR attention deficit disorder hyperactivity OR child attention deficit disorder OR hyperkinetic syndromes OR syndromes hyperkinetic OR hyperkinetic syndrome childhood) AND (neurofeedback OR neuro feedback OR "EEG biofeedback" OR neuro therapy OR neurotherapy OR SCP OR "slow cortical potentials") AND (Methylphenidate\* OR methylphenidate\* OR Ritalin OR ritalin)

OVID medline :33

(adhd OR adhd OR attention deficit disorder with hyperactivity OR minimal brain disorder OR syndrome hyperkinetic OR hyperkinetic syndrome OR hyperactivity disorder OR hyperactive child syndrome OR childhood hyperkinetic syndrome OR attention deficit hyperactivity disorders OR attention deficit hyperactivity disorder OR adhd attention deficit hyperactivity disorder OR addh OR overactive child syndrome OR attention deficit hyperkinetic disorder OR hyperkinetic disorder OR attention deficit disorder hyperactivity OR attention deficit disorder hyperactivity OR child attention deficit disorder OR hyperkinetic syndromes OR syndromes hyperkinetic OR hyperkinetic syndrome childhood) AND (neurofeedback OR neuro feedback OR "EEG biofeedback" OR neuro therapy OR neurotherapy OR SCP OR "slow cortical potentials") AND (Methylphenidate\* OR methylphenidate\* OR Ritalin OR ritalin)

ERIC:3

(adhd OR adhd OR attention deficit disorder with hyperactivity OR minimal brain disorder OR syndrome hyperkinetic OR hyperkinetic syndrome OR hyperactivity disorder OR hyperactive child syndrome OR childhood hyperkinetic syndrome OR attention deficit hyperactivity disorders OR attention deficit hyperactivity disorder OR adhd attention deficit hyperactivity disorder OR addh OR overactive child syndrome OR attention deficit hyperkinetic disorder OR hyperkinetic disorder OR attention deficit disorder hyperactivity OR attention deficit disorder hyperactivity OR child attention deficit disorder OR hyperkinetic syndromes OR syndromes hyperkinetic OR hyperkinetic syndrome childhood) AND (neurofeedback OR neuro feedback OR "EEG biofeedback" OR neuro therapy OR neurotherapy OR SCP OR "slow cortical potentials") AND (Methylphenidate\* OR methylphenidate\* OR Ritalin OR ritalin)

CNKI 149

Chongqing VIP 24

Wanfang 19

Clinicaltrials.gov, clinicaltrialsregister.eu, and osf.io 11

Records after duplicates removed 392

## Supplemental Material 2 List of excluded studies

| Studies Excluded                                                                                                                                                                                                                                                                                                                         | Reason(s) for exclusion                                      |
|------------------------------------------------------------------------------------------------------------------------------------------------------------------------------------------------------------------------------------------------------------------------------------------------------------------------------------------|--------------------------------------------------------------|
| Ahmann, P. A., Waltonen, S. J., Olson, K. A., Theye, F. W., Van Erem, A. J., & LaPlant, R. J. (1993). Placebo-controlled evaluation of Ritalin side effects. <i>Pediatrics</i> , 91(6), 1101-1106.                                                                                                                                       | No neurofeedback group as per protocol, only methylphenidate |
| Ali Nazari, M., & Berquin, P. (2010). <i>Effect of electrical activity feedback on cognition</i> .                                                                                                                                                                                                                                       | No M SD data                                                 |
| Buchmann, J., Gierow, W., Weber, S., Hoepfner, J., Klauer, T., Benecke, R., . . . Wolters, A. (2007). Restoration of disturbed intracortical motor inhibition and facilitation in attention deficit hyperactivity disorder children by methylphenidate. <i>Biol Psychiatry</i> , 62(9), 963-969. doi:10.1016/j.biopsych.2007.05.010      | No neurofeedback group as per protocol, only methylphenidate |
| Chen G, Zhang K. Evaluation of Neurofeedback therapy for children with attention deficit hyperactivity disorder. <i>Journal of Clinical Rehabilitative Tissue Engineering Research</i> . 2008;12(30):5969-5972.                                                                                                                          | Review                                                       |
| Chen G, Xie W, Zhong K. Review of neurofeedback in the treatment of attention deficit hyperactivity disorder in children. <i>Journal of Mianyang Teachers University</i> . 2013;32(02):76-80+98.                                                                                                                                         | review                                                       |
| Christiansen, H., Reh, V., Schmidt, M. H., & Rief, W. (2014). Slow cortical potential neurofeedback and self-management training in outpatient care for children with ADHD: study protocol and first preliminary results of a randomized controlled trial. <i>Front Hum Neurosci</i> , 8. doi:10.3389/fnhum.2014.00943                   | Just a protocol                                              |
| Cortese, S., D'Acunto, G., Konofal, E., Masi, G., & Vitiello, B. (2017). New Formulations of Methylphenidate for the Treatment of Attention-Deficit/Hyperactivity Disorder: Pharmacokinetics, Efficacy, and Tolerability. <i>CNS Drugs</i> , 31(2), 149-160. doi:10.1007/s40263-017-0409-0                                               | Review, no empirical data                                    |
| Cortese, S., Panei, P., Arcieri, R., Germinario, E. A., Capuano, A., Margari, L., . . . Curatolo, P. (2015). Safety of Methylphenidate and Atomoxetine in Children with Attention-Deficit/Hyperactivity Disorder (ADHD): Data from the Italian National ADHD Registry. <i>CNS Drugs</i> , 29(10), 865-877. doi:10.1007/s40263-015-0266-7 | Meta-analysis, no empirical data                             |
| de Sonnevile, L. M., Njokiktjien, C., & Hilhorst, R. C. (1991). Methylphenidate-induced changes in ADHD information processors. <i>J Child Psychol Psychiatry</i> , 32(2), 285-295.                                                                                                                                                      | No neurofeedback group as per protocol, only methylphenidate |
| deBeus, R. J., & Kaiser, D. A. (2011). <i>Neurofeedback with Children with Attention Deficit Hyperactivity Disorder: A Randomized Double-Blind Placebo-Controlled Study</i> .                                                                                                                                                            | No methylphenidate group                                     |
| Dura-Trave, T., Yoldi-Petri, M. E., Gallinas-Victoriano, F., & Zardoya-Santos, P. (2012). Effects of osmotic-release methylphenidate on height and weight in children with attention-deficit hyperactivity disorder (ADHD) following up to four years of treatment. <i>J Child Neurol</i> , 27(5), 604-609. doi:10.1177/0883073811422752 | No methylphenidate group as per protocol, only neurofeedback |

|                                                                                                                                                                                                                                                                                                    |                                                              |
|----------------------------------------------------------------------------------------------------------------------------------------------------------------------------------------------------------------------------------------------------------------------------------------------------|--------------------------------------------------------------|
| Flisiak-Antonijczuk, H., Adamowska, S., Chladzinska-Kiejna, S., Kalinowski, R., & Adamowski, T. (2015). Treatment of ADHD: comparison of EEG-biofeedback and methylphenidate. <i>Archives of Psychiatry and Psychotherapy, 17</i> (4), 31-38.                                                      | Not randomized and no data                                   |
| Fox, D. J., Tharp, D. F., & Fox, L. C. (2005). Neurofeedback: an alternative and efficacious treatment for Attention Deficit Hyperactivity Disorder. <i>Applied Psychophysiology &amp; Biofeedback, 30</i> (4), 365-373.                                                                           | Review                                                       |
| Fuchs, T., Birbaumer, N., Lutzenberger, W., Gruzelier, J. H., & Kaiser, J. (2003). Neurofeedback treatment for attention-deficit/hyperactivity disorder in children: A comparison with methylphenidate. <i>Appl Psychophysiol Biofeedback, 28</i> (1), 1-12. doi:10.1023/a:1022353731579           | Not randomized                                               |
| Gevensleben, H., Holl, B., Albrecht, B., Schlamp, D., Kratz, O., Studer, P., . . . Heinrich, H. (2010). Neurofeedback training in children with ADHD: 6-month follow-up of a randomised controlled trial. <i>Eur Child Adolesc Psychiatry, 19</i> (9), 715-724. doi:10.1007/s00787-010-0109-5      | No methylphenidate group as per protocol, only neurofeedback |
| Gevensleben, H., Moll, G. H., & Heinrich, H. (2010). Neurofeedback training in children with ADHD: behavioral and neurophysiological effects. <i>Zeitschrift Fur Kinder-Und Jugendpsychiatrie Und Psychotherapie, 38</i> (6), 409-420. doi:10.1024/1422-4917/a000070                               | No methylphenidate group as per protocol, only neurofeedback |
| Huang H, Zhang W, Fu J, Xu L, Yan L. The role of psychological behavior intervention in children with attention deficit hyperactivity disorder after Neurobiofeedback therapy. <i>Journal of Medical Postgraduates. 2008;21</i> (02):223-224.                                                      | No methylphenidate group as per protocol, only neurofeedback |
| Hodgson, K., Hutchinson, A. D., & Denson, L. (2014). Nonpharmacological Treatments for ADHD A Meta-Analytic Review. <i>Journal of Attention Disorders, 18</i> (4), 275-282. doi:10.1177/1087054712444732                                                                                           | Meta-analysis                                                |
| Holtmann, M., Stadler, C., Leins, U., Strehl, U., Birbaumer, N., & Poustka, F. (2004). [Neurofeedback for the treatment of attention-deficit/hyperactivity disorder (ADHD) in childhood and adolescence]. <i>Zeitschrift fur Kinder und Jugendpsychiatrie und Psychotherapie, 32</i> (3), 187-200. | review                                                       |
| Lan G. <i>Meta-analysis of the effects of domestic attention deficit hyperactivity disorder intervention</i> , Northeast Normal University; 2007                                                                                                                                                   | Meta-analysis                                                |
| Lansbergen, M. M., van Dongen-Boomsma, M., Buitelaar, J. K., & Slaats-Willemse, D. (2011). ADHD and EEG-neurofeedback: a double-blind randomized placebo-controlled feasibility study. <i>Journal of Neural Transmission, 118</i> (2), 275-284. doi:10.1007/s00702-010-0524-2                      | No methylphenidate group as per protocol, only neurofeedback |
| Leins, U., Goth, G., Hinterberger, T., Klinger, C., Rumpf, N., & Strehl, U. (2007). Neurofeedback for children with ADHD: A comparison of SCP and Theta/Beta protocols. <i>Appl Psychophysiol Biofeedback, 32</i> (2), 73-88. doi:10.1007/s10484-007-9031-0                                        | No methylphenidate group as per protocol, only neurofeedback |
| Leitner, Y., Barak, R., Giladi, N., Peretz, C., Eshel, R., Gruendlinger, L., & Hausdorff, J. M. (2007). Gait in attention deficit hyperactivity disorder : effects of methylphenidate and dual tasking. <i>J Neurol, 254</i> (10), 1330-1338. doi:10.1007/s00415-006-0522-3                        | No methylphenidate group as per protocol, only neurofeedback |
| Leitner, Y., Doniger, G. M., Barak, R., Simon, E. S., & Hausdorff, J. M. (2007). A novel multidomain computerized cognitive assessment for                                                                                                                                                         | No methylphenidate group as per                              |

|                                                                                                                                                                                                                                                                                                                                  |                                                              |
|----------------------------------------------------------------------------------------------------------------------------------------------------------------------------------------------------------------------------------------------------------------------------------------------------------------------------------|--------------------------------------------------------------|
| attention-deficit hyperactivity disorder: evidence for widespread and circumscribed cognitive deficits. <i>J Child Neurol</i> , 22(3), 264-276. doi:10.1177/0883073807299859                                                                                                                                                     | protocol, only neurofeedback                                 |
| Levesque, J., Beauregard, M., & Mensour, B. (2006). Effect of neurofeedback training on the neural substrates of selective attention in children with attention-deficit/hyperactivity disorder: A functional magnetic resonance imaging study. <i>Neurosci Lett</i> , 394(3), 216-221. doi:10.1016/j.neulet.2005.10.100          | No methylphenidate group as per protocol, only neurofeedback |
| Li J, Hu X. Efficacy analysis of Neurofeedback and Ritalin in the treatment of children with attention deficit hyperactivity disorder. <i>Journal of Public Health and Preventive Medicine</i> . 2012;23(04):111-112.                                                                                                            | No neurofeedback vs methylphate                              |
| Li L. Advances in research on electroencephalographic biofeedback therapy for attention deficit hyperactivity disorder. <i>Chinese Journal of Behavioral Medical Science</i> . 2005;14(03):93-95.                                                                                                                                | review                                                       |
| Li, L., Yang, L., Zhuo, C.-j., & Wang, Y.-F. (2013). A randomised controlled trial of combined EEG feedback and methylphenidate therapy for the treatment of ADHD. <i>Swiss Medical Weekly</i> , 143. doi:10.4414/smw.2013.13838                                                                                                 | Combined EEG feedback and methylphenidate therapy            |
| Lubar, J. F., Swartwood, M. O., Swartwood, J. N., & Odonnell, P. H. (1995). EVALUATION OF THE EFFECTIVENESS OF EEG NEUROFEEDBACK TRAINING FOR ADHD IN A CLINICAL SETTING AS MEASURED BY CHANGES IN TOVA SCORES, BEHAVIORAL RATINGS, AND WISC-R PERFORMANCE. <i>Biofeedback Self Regul</i> , 20(1), 83-99. doi:10.1007/bf01712768 | No methylphenidate group as per protocol, only neurofeedback |
| Lv B, Liu Y, Huang B, Li H, Deng X. Clinical Observation on 31 Cases of Children with Attentional Hyperactivity Deficit Treated by Neurofeedback. <i>Journal of Youjiang Medical College</i> . 2006(04):633-634.                                                                                                                 | NO M SD, just OR                                             |
| Jiang L, Chen D, Su Y. Changes of IVA-CPT before and after Neurofeedback therapy in children with ADHD. <i>Chinese Journal of Child Health Care</i> . 2007(05):468-470.                                                                                                                                                          | Only one group ,no MPH group                                 |
| Jiang R, Wang Y. The Effect of EEG Feedback on Cognitive Function of Children with ADHD <i>Chinese Mental Health Journal</i> . 2002;13(07):462-464+453.                                                                                                                                                                          | review                                                       |
| Micoulaud-Franchi, J. A., Bat-Pitault, F., Cermolacce, M., & Vion-Dury, J. (2011). Neurofeedback for attention-deficit/hyperactivity disorder: From efficacy to neurophysiology specificity effect. <i>Annales Medico-Psychologiques</i> , 169(3), 200-208. doi:10.1016/j.amp.2011.02.007                                        | No methylphenidate group as per protocol, only neurofeedback |
| Millichap, J. G., Millichap, J. J., & Stack, C. V. (2011). Utility of the electroencephalogram in attention deficit hyperactivity disorder. <i>Clin EEG Neurosci</i> , 42(3), 180-184. doi:10.1177/155005941104200307                                                                                                            | review                                                       |
| Monastra, V. J., Monastra, D. M., & George, S. (2002). The effects of stimulant therapy, EEG biofeedback, and parenting style on the primary symptoms of attention-deficit/hyperactivity disorder. <i>Applied Psychophysiology &amp; Biofeedback</i> , 27(4), 231-249.                                                           | Incomplete data                                              |
| Ogrim G, Hestad KA. Effects of neurofeedback versus stimulant medication in attention-deficit/hyperactivity disorder: a randomized pilot study. <i>J Child Adolesc Psychopharmacol</i> . 2013;23(7):448-457.                                                                                                                     | Medicine group not purê methylphenidate, with                |

|                                                                                                                                                                                                                                                                                                  |                                                              |
|--------------------------------------------------------------------------------------------------------------------------------------------------------------------------------------------------------------------------------------------------------------------------------------------------|--------------------------------------------------------------|
|                                                                                                                                                                                                                                                                                                  | dextroamphetamine, or a placebo                              |
| Papavasiliou, A. S., Nikaina, I., Rizou, I., & Alexandrou, S. (2007). Effects of psycho-educational training and stimulant medication on visual perceptual skills in children with attention deficit hyperactivity disorder. <i>Neuropsychiatr Dis Treat</i> , 3(6), 949-954.                    | No neurofeedback group as per protocol, only methylphenidate |
| Razoki B. Neurofeedback versus psychostimulants in the treatment of children and adolescents with attention-deficit/hyperactivity disorder: a systematic review. <i>Neuropsychiatric disease and treatment</i> . 2018;14:2905-2913.                                                              | systematic review                                            |
| Rossiter, T. (2004a). The effectiveness of neurofeedback and stimulant drugs in treating AD/HD: Part I. Review of methodological issues. <i>Appl Psychophysiol Biofeedback</i> , 29(2), 95-112. doi:10.1023/B:APBI.0000026636.13180.b6                                                           | review                                                       |
| Rossiter, T. (2004b). The effectiveness of neurofeedback and stimulant drugs in treating AD/HD: Part II. Replication. <i>Appl Psychophysiol Biofeedback</i> , 29(4), 233-243. doi:10.1007/s10484-004-0383-4                                                                                      | review                                                       |
| Rossiter TR, La Vaque TJ. A comparison of eeg biofeedback and psychostimulants in treating attention deficit/hyperactivity disorders. <i>Journal of Neurotherapy</i> . 1995;1(1):48-59.                                                                                                          | Not randomized, Med group not only methylphenidate           |
| Shouse, M. N., & Lubar, J. F. (1979). OPERANT-CONDITIONING OF EEG RHYTHMS AND RITALIN IN THE TREATMENT OF HYPERKINESIS. <i>Biofeedback Self Regul</i> , 4(4), 299-312. doi:10.1007/bf00998960                                                                                                    | No RCT                                                       |
| Socanski, D., Aurlien, D., Herigstad, A., Thomsen, P. H., & Larsen, T. K. (2015). Attention deficit/hyperactivity disorder and interictal epileptiform discharges: it is safe to use methylphenidate? <i>Seizure</i> , 25, 80-83. doi:10.1016/j.seizure.2015.01.002                              | No neurofeedback group as per protocol, only methylphenidate |
| Stankus, T. (2008). Can the Brain Be Trained? Comparing the Literature on the Use of EEG Biofeedback/Neurofeedback as an Alternative or Complementary Therapy for Attention Deficit Hyperactivity Disorder (ADHD). <i>Behavioral &amp; Social Sciences Librarian</i> , 26(4), 20-56.             | review                                                       |
| Sunohara, G. A., Voros, J. G., Malone, M. A., & Taylor, M. J. (1997). Effects of methylphenidate in children with attention deficit hyperactivity disorder: a comparison of event-related potentials between medication responders and non-responders. <i>Int J Psychophysiol</i> , 27(1), 9-14. | No neurofeedback group as per protocol, only methylphenidate |
| Tang W, Tong J, Xu M. Effect of methylphenidate controlled release combined with Neurofeedback on children with attention deficit hyperactivity disorder. <i>Modern Practical Medicine</i> . 2014;21(6):708-710.                                                                                 | No NF only group                                             |
| Van Doren, J., Arns, M., Heinrich, H., Vollebregt, M. A., Strehl, U., & K Loo, S. (2018). Sustained effects of neurofeedback in ADHD: a systematic review and meta-analysis. <i>Eur Child Adolesc Psychiatry</i> . doi:10.1007/s00787-018-1121-4                                                 | Review and meta analysis                                     |
| Wang R. <i>Prostecdtive Efficacy and Influence of Combination of EEG Biofeedback and Stimulant Medication Treatment on Cognitive of Child with Attention Deficit/Hyperactivity Disorder</i> , Hebei Medical University; 2007.                                                                    | No neurofeedback vs methylphate                              |
| Yao H, Chen Y, Kang R, Zhao S, Ding D. A comparative study of methylphenidate combined with EEG biofeedback in the treatment                                                                                                                                                                     | No MPH only group, just NF and                               |

|                                                                                                                                                                                 |              |
|---------------------------------------------------------------------------------------------------------------------------------------------------------------------------------|--------------|
| of attention deficit hyperactivity disorder with specific dyslexia. <i>Journal of Clinical Psychiatry</i> . 2010(6):393-394.                                                    | NF+MPH       |
| Zhang F. Advances in Neurofeedback therapy for children with attention deficit hyperactivity disorder. <i>Chinese Journal of Practical Pediatrics</i> . 2002;27(12):756-758     | review       |
| Zhao R, He X, Zhang Y. Therapeutic effect of EEG biofeedback on children with attention deficit hyperactivity disorder. <i>Sichuan Medical Journal</i> . 2009;30(12):1950-1951. | Noenoughdata |



### Supplemental Material 3 List of included studies

| Author        | References(s)                                                                                                                                                                                                                                                                                                                                                                                                                                                                                                                                                                                                                                                                                                                                                                                                                                                                                                                                                                                                                                                                                                                                                                                                                                                                                                                                                                                            |
|---------------|----------------------------------------------------------------------------------------------------------------------------------------------------------------------------------------------------------------------------------------------------------------------------------------------------------------------------------------------------------------------------------------------------------------------------------------------------------------------------------------------------------------------------------------------------------------------------------------------------------------------------------------------------------------------------------------------------------------------------------------------------------------------------------------------------------------------------------------------------------------------------------------------------------------------------------------------------------------------------------------------------------------------------------------------------------------------------------------------------------------------------------------------------------------------------------------------------------------------------------------------------------------------------------------------------------------------------------------------------------------------------------------------------------|
| Chen (2007)   | Chen, P., Zhang, F., & Ye, M. (2007). Study on the effectiveness of EEG biofeedback on attention deficit hyperactivity disorder. <i>Maternal and Child Health Care of China</i> , 22(18), 2517-2519.                                                                                                                                                                                                                                                                                                                                                                                                                                                                                                                                                                                                                                                                                                                                                                                                                                                                                                                                                                                                                                                                                                                                                                                                     |
| Chen (2009)   | Chen, Y. (2009). <i>Clinical features of children with different subtypes of ADHD and therapeutic effects of OROS-MPH</i> . Jinan University,                                                                                                                                                                                                                                                                                                                                                                                                                                                                                                                                                                                                                                                                                                                                                                                                                                                                                                                                                                                                                                                                                                                                                                                                                                                            |
| Chen (2011)   | Chen, Y., Kang, R., Zhao, S., & Ding, D. (2011). A comparative study on the efficacy of methylphenidate and Neurofeedback in the treatment of attention deficit hyperactivity disorder in children. <i>Practical Preventive Medicine</i> , 18(10), 1956-1957.                                                                                                                                                                                                                                                                                                                                                                                                                                                                                                                                                                                                                                                                                                                                                                                                                                                                                                                                                                                                                                                                                                                                            |
| Du(2014 )     | Du, W., Cui, L., Wang, P., Qi, H., Zhang, J., & Dong, J. (2014). Comparison of EEG Biofeedback and Ritalin in Treating Children with Different Subtypes of Attention Deficit Hyperactivity Disorder. <i>The Journal of Practical Medicine</i> , 30(16), 2645-2647.                                                                                                                                                                                                                                                                                                                                                                                                                                                                                                                                                                                                                                                                                                                                                                                                                                                                                                                                                                                                                                                                                                                                       |
| Duric (2017)  | <p>Duric, N. S., Assmus, J., Gundersen, D., DuricGolos, A., &amp;Elgen, I. B. (2017). Multimodal treatment in children and adolescents with attention-deficit/hyperactivity disorder: a 6-month follow-up. <i>Nord J Psychiatry</i>, 71(5), 386-394. doi:10.1080/08039488.2017.1305446</p> <p>Duric, N. S., Asmus, J., &amp;Elgen, I. B. (2014). Self-reported efficacy of neurofeedback treatment in a clinical randomized controlled study of ADHD children and adolescents. <i>Neuropsychiatric Disease and Treatment Vol 10 2014, ArtID 1645-1654, 10</i>.</p> <p>Duric, N. S., Assmus, J., Gundersen, D., &amp;Elgen, I. B. (2012). Neurofeedback for the treatment of children and adolescents with ADHD: a randomized and controlled clinical trial using parental reports. <i>BMC Psychiatry</i>, 12, 107. doi:10.1186/1471-244x-12-107</p>                                                                                                                                                                                                                                                                                                                                                                                                                                                                                                                                                      |
| Fan(2012)     | Fan, Q. (2012). EEG biofeedback in the treatment of children with attention deficit hyperactivity disorder a clinical study. <i>China Practical Medical</i> , 7(36), 18-19.                                                                                                                                                                                                                                                                                                                                                                                                                                                                                                                                                                                                                                                                                                                                                                                                                                                                                                                                                                                                                                                                                                                                                                                                                              |
| Gelade (2018) | <p>Gelade, K., Janssen, T. W. P., Bink, M., Twisk, J. W. R., van Mourik, R., Maras, A., &amp;Oosterlaan, J. (2018). A 6-month follow-up of an RCT on behavioral and neurocognitive effects of neurofeedback in children with ADHD. <i>Eur Child Adolesc Psychiatry</i>, 27(5), 581-593. doi:10.1007/s00787-017-1072-1</p> <p>Gelade, K., Bink, M., Janssen, T. W. P., van Mourik, R., Maras, A., &amp;Oosterlaan, J. (2017). An RCT into the effects of neurofeedback on neurocognitive functioning compared to stimulant medication and physical activity in children with ADHD. <i>European Child and Adolescent Psychiatry</i>, 26(4), 457-468. doi:http://dx.doi.org/10.1007/s00787-016-0902-x</p> <p>Gelade, K., Janssen, T. W. P., Bink, M., Van Mourik, R., Maras, A., &amp;Oosterlaan, J. (2016). Behavioral effects of neurofeedback compared to stimulants and physical activity in attention-deficit/hyperactivity disorder: A randomized controlled trial. <i>Journal of Clinical Psychiatry</i>, 77(10), e1270-e1277. doi:http://dx.doi.org/10.4088/JCP.15m10149</p> <p>Janssen, T. W., Bink, M., Gelade, K., Mourik, R., Maras, A., &amp;Oosterlaan, J. (2016). A randomized controlled trial into the effects of neurofeedback, methylphenidate, and physical activity on EEG power spectra in children with ADHD. <i>Journal of Child Psychology and Psychiatry</i>, 57(5), 633-644.</p> |

|                |                                                                                                                                                                                                                                                                                                                                                                                                                                                                                                                                                                                                                                                                                                                                                                                                                                                                                  |
|----------------|----------------------------------------------------------------------------------------------------------------------------------------------------------------------------------------------------------------------------------------------------------------------------------------------------------------------------------------------------------------------------------------------------------------------------------------------------------------------------------------------------------------------------------------------------------------------------------------------------------------------------------------------------------------------------------------------------------------------------------------------------------------------------------------------------------------------------------------------------------------------------------|
|                | <p>doi:<a href="http://dx.doi.org/10.1111/jcpp.12517">http://dx.doi.org/10.1111/jcpp.12517</a><br/> Janssen, T. W., Bink, M., Gelade, K., van Mourik, R., Maras, A., &amp;Oosterlaan, J. (2016). A Randomized Controlled Trial Investigating the Effects of Neurofeedback, Methylphenidate, and Physical Activity on Event-Related Potentials in Children with Attention-Deficit/Hyperactivity Disorder. <i>Journal of Child &amp; Adolescent Psychopharmacology</i>, 26(4), 344-353.<br/> doi:<a href="https://dx.doi.org/10.1089/cap.2015.0144">https://dx.doi.org/10.1089/cap.2015.0144</a><br/> Janssen, T. W. P., Bink, M., Weeda, W. D., Gelade, K., van Mourik, R., Maras, A., &amp;Oosterlaan, J. (2017). Learning curves of theta/beta neurofeedback in children with ADHD. <i>Eur Child Adolesc Psychiatry</i>, 26(5), 573-582.<br/> doi:10.1007/s00787-016-0920-8</p> |
| Ji (2009)      | <p>Ji, Y., Kuang, G., Xie, J., Xia, Y., &amp;Heng, Z. (2009). Comparative Study on Neurofeedback and Methylphenidate in the Treatment of Different Subtypes of Attention Deficit Hyperactivity Disorder. <i>Chinese Journal of Child Health Care</i>, 17(05), 573-575.</p>                                                                                                                                                                                                                                                                                                                                                                                                                                                                                                                                                                                                       |
| Kong (2007)    | <p>Kong, D., Huo, J., Fu, H., Liu, J., Qiu, S., Zhang, Y., &amp; Yuan, H. (2007). Controlled Study on Long- term Effect of EEG Biofeedback on ADHD. <i>Journal of Medical Forum</i>, 28(02), 20-22.<br/> Kong, D. (2008). <i>Cognitive Behavior Intervention on Children with ADHD</i>. , Southwest University, Retrieved from <a href="http://www.wanfangdata.com.cn/details/detail.do?_type=degree&amp;id=Y1263853">www.wanfangdata.com.cn/details/detail.do?_type=degree&amp;id=Y1263853</a></p>                                                                                                                                                                                                                                                                                                                                                                              |
| Li (2001)      | <p>Li, X., Wang, Y., &amp; Shu, L. (2001). A controlled study on the effectiveness of EEG biofeedback on attention deficit hyperactivity disorder. <i>chinese journal of psychiatry</i>, 34(3), 168-171.<br/> Zhang, Y., Li, X., &amp; Wang, Y. (2003). Changes in Attention Variables in Follow-up Study of Neurofeedback Treatment for Attention Deficit Hyperactivity Disorder. <i>Chinese Journal of Pediatrics</i>, 41(11), 56-57.</p>                                                                                                                                                                                                                                                                                                                                                                                                                                      |
| Meisel (2013)  | <p>Meisel, V., Servera, M., Garcia-Banda, G., Cardo, E., &amp; Moreno, I. (2013). Neurofeedback and standard pharmacological intervention in ADHD: a randomized controlled trial with six-month follow-up. <i>BiolPsychol</i>, 94(1), 12-21. doi:10.1016/j.biopsycho.2013.04.015</p>                                                                                                                                                                                                                                                                                                                                                                                                                                                                                                                                                                                             |
| Moreno (2015)  | <p>Moreno-Garcia, I., Delgado-Pardo, G., Camacho-Vara de Rey, C., Meneres-Sancho, S., &amp;Servera-Barcelo, M. (2015). Neurofeedback, pharmacological treatment and behavioral therapy in hyperactivity: Multilevel analysis of treatment effects on electroencephalography. <i>International Journal of Clinical and Health Psychology</i>, 15(3), 217-225. doi:10.1016/j.ijchp.2015.04.003</p>                                                                                                                                                                                                                                                                                                                                                                                                                                                                                 |
| Sudnawa (2018) | <p>Sudnawa, K. K., Chirdkiatgumchai, V., Ruangdaraganon, N., Khongkhatithum, C., Udomsubpayakul, U., Jirayucharoensak, S., &amp;Israsena, P. (2018). Effectiveness of Neurofeedback Versus Medication in Treatment of ADHD. <i>Pediatr Int</i>. doi:10.1111/ped.13641</p>                                                                                                                                                                                                                                                                                                                                                                                                                                                                                                                                                                                                        |
| Tang (2017)    | <p>Tang, M., Tan, Q., Huang, W., Tan, C., &amp; Xiang, Z. (2017). Effect of Ritalin on cognitive function of children with ADHD. <i>Journal of International Psychiatry</i>, 44(02), 240-242.</p>                                                                                                                                                                                                                                                                                                                                                                                                                                                                                                                                                                                                                                                                                |
| Yang (2016)    | <p>Yang, X. (2016). EEG biofeedback and methylphenidate treatment in different subtypes of attention deficit hyperactivity disorder Comparative Study. <i>For all Health</i>, 10(09), 72-73.</p>                                                                                                                                                                                                                                                                                                                                                                                                                                                                                                                                                                                                                                                                                 |
| Zhang (2006)   | <p>Zhang, F., Zhang, J., &amp;Jin, X. (2006). Effect of electroencephalogram biofeedback on behavioral problems of children with attention deficit hyperactivity disorder <i>Chinese Journal of Clinical Rehabilitation</i>, 10(10), 74-76.</p>                                                                                                                                                                                                                                                                                                                                                                                                                                                                                                                                                                                                                                  |

|             |                                                                                                                                                                                                                                                                  |
|-------------|------------------------------------------------------------------------------------------------------------------------------------------------------------------------------------------------------------------------------------------------------------------|
|             | Zhang, F., Zhang, J., & Shen, X. (2006). A comparative study on the effect of Neurofeedback on attention quality in children with attention deficit hyperactivity disorder. <i>Chinese Journal of Physical Medicine and Rehabilitation</i> , 28(04), 270-273.    |
| Zhou (2012) | Zhou, G., Zhou, Y., Fang, C., Hhuang, C., Sun, X., Sun, Y., . . . Zhu, X. (2012). To observe the different efficacy of three kinds of treatments for children with attention deficit hyperactivity disorder (ADHD) . <i>China Modern Doctor</i> , 50(17), 60-63. |
| Zuo(2009)   | Zuo, C., Shen, S., Chai, L., Zhang, L., & Yan, L. (2009). Clinical observation of biofeedback therapy for the treatment of attention deficit hyperactivity disorder. <i>Shandong Medicine</i> , 49(43), 88-89.                                                   |

**Supplemental Material 4** Rating for each item of the Cochrane Collaboration risk of bias tool (ROB)

| Study          | Random sequence generation | Allocation concealment | Blinding of participants and personnel. Assessments should be made for each main outcome (or class of outcomes). | Blinding of outcome assessment. Assessments should be made for each main outcome (or class of outcomes). | Incomplete outcome data. Assessments should be made for each main outcome (or class of outcomes) | Selective reporting | Other sources of bias |
|----------------|----------------------------|------------------------|------------------------------------------------------------------------------------------------------------------|----------------------------------------------------------------------------------------------------------|--------------------------------------------------------------------------------------------------|---------------------|-----------------------|
| Chen (2007)    | Low                        | High                   | High                                                                                                             | High                                                                                                     | Unclear                                                                                          | Low                 | Low                   |
| Chen (2009)    | Low                        | High                   | High                                                                                                             | High                                                                                                     | Unclear                                                                                          | Low                 | Low                   |
| Chen (2011)    | Low                        | High                   | High                                                                                                             | High                                                                                                     | Unclear                                                                                          | Low                 | Low                   |
| Du (2014)      | Low                        | High                   | High                                                                                                             | High                                                                                                     | High                                                                                             | Low                 | Low                   |
| Duric (2017)   | Low                        | High                   | High                                                                                                             | High                                                                                                     | High                                                                                             | Low                 | Low                   |
| Fan (2012)     | High                       | High                   | High                                                                                                             | High                                                                                                     | High                                                                                             | Low                 | Low                   |
| Gelade (2017)  | Low                        | Unclear                | High                                                                                                             | Low                                                                                                      | High                                                                                             | Low                 | Low                   |
| Ji (2009)      | Low                        | High                   | High                                                                                                             | High                                                                                                     | High                                                                                             | Low                 | Low                   |
| Kong (2007)    | Low                        | High                   | High                                                                                                             | High                                                                                                     | High                                                                                             | Low                 | Low                   |
| Li (2001)      | Low                        | High                   | High                                                                                                             | High                                                                                                     | High                                                                                             | Low                 | Low                   |
| Meisel (2014)  | Low                        | High                   | High                                                                                                             | High                                                                                                     | High                                                                                             | Low                 | Low                   |
| Moreno (2017)  | Low                        | High                   | High                                                                                                             | Low                                                                                                      | Low                                                                                              | Low                 | Low                   |
| Sudnawa (2018) | Low                        | High                   | High                                                                                                             | High                                                                                                     | High                                                                                             | Low                 | Low                   |
| Tang (2017)    | Low                        | High                   | High                                                                                                             | High                                                                                                     | High                                                                                             | Low                 | Low                   |
| Yang (2016)    | Low                        | High                   | High                                                                                                             | High                                                                                                     | High                                                                                             | Low                 | Low                   |
| Zhang (2006)   | Low                        | High                   | High                                                                                                             | High                                                                                                     | High                                                                                             | Low                 | Low                   |
| Zhou (2012)    | High                       | High                   | High                                                                                                             | High                                                                                                     | High                                                                                             | Low                 | Low                   |
| Zuo (2009)     | Low                        | High                   | High                                                                                                             | High                                                                                                     | High                                                                                             | Low                 | Low                   |

## Supplemental Figure 1 Prisma chart for the study selection progress.

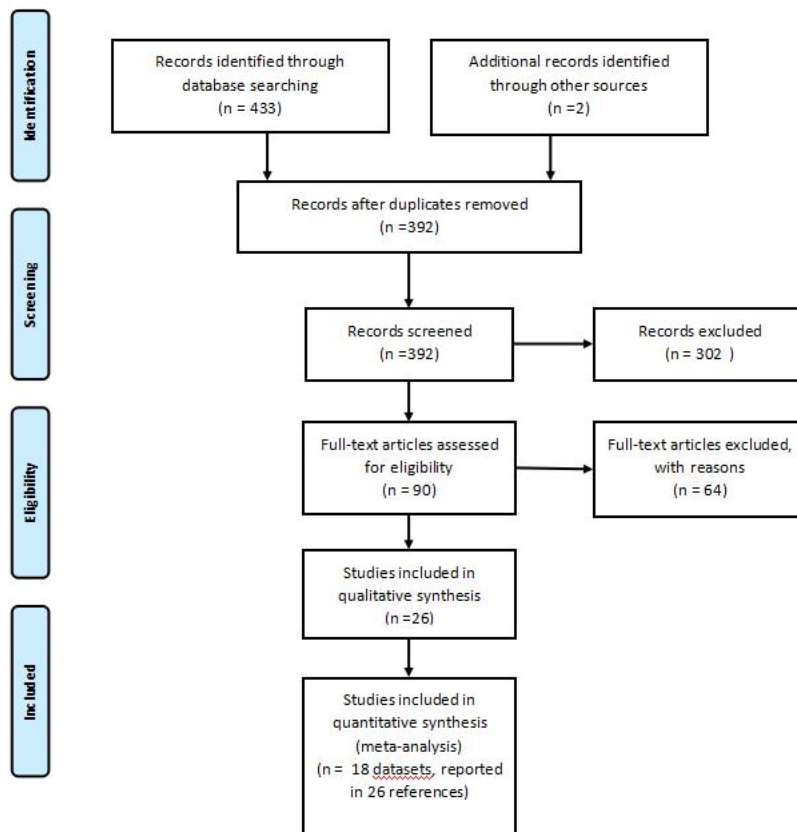

Fig.1. Prisma chart for the study selection progress.

## Supplemental Figure 2 Forest plots of Meta analysis (rated by teachers, post-treatment)

### Meta Analysis total score rated by teacher (post-treatment)

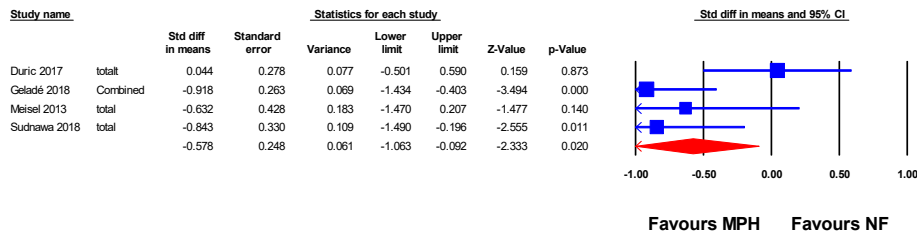

Meta Analysis

Suppl. Fig.2-1: Total score change rated by teacher(post-treatment), SMD: -0.578, CI [-1.063; -0.092],  $I^2$ : 59.126 Egger:  $p$ =.890

### Meta Analysis hyperactivity rated by teacher (post-treatment)

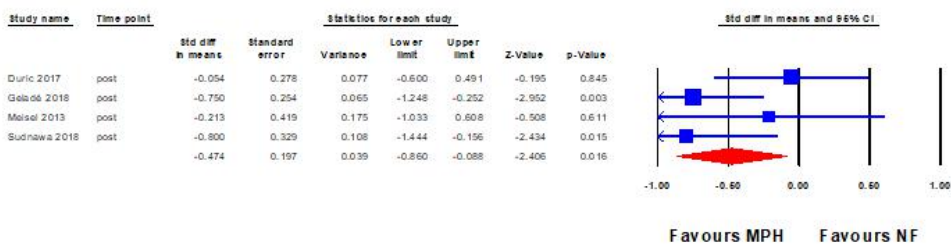

Meta Analysis

Suppl. Figure 2-2: Hyperactivity score change rated by teacher(post-treatment), SMD: -0.474, CI [-0.860; -0.088],  $I^2$ : 37.818 Egger:  $p$ =.784

### Meta Analysis inattention rated by teacher (post-treatment)

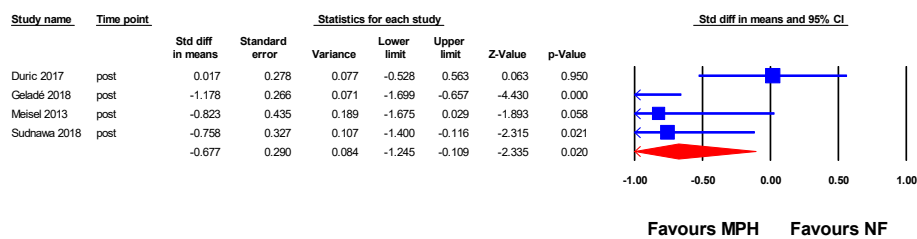

Meta Analysis

Suppl. Figure 2-3: Inattention score change rated by teacher(post-treatment), SMD: -0.677, CI [-1.245; -0.109],  $I^2$ : 0.000 Egger:  $p$ =.927

## Supplemental Figure 3 Forest plots of Meta analysis (rated by parents, post-treatment)

### Meta Analysis total score change rated by parents(post-treatment)

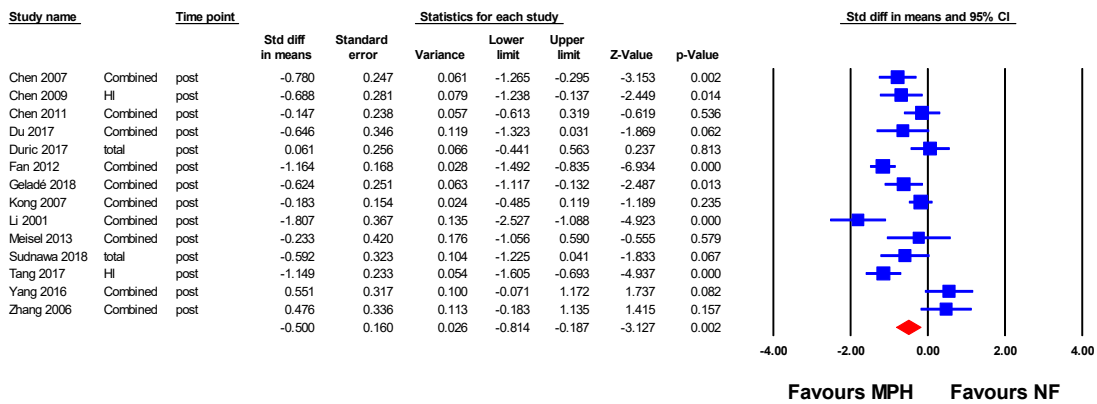

#### Meta Analysis

Suppl. Figure 3-1: Total score change rated by parents(post-treatment), SMD: -0.500, CI [-0.814; -0.187], I<sup>2</sup>: 81.187 Egger: p=.676

### Meta Analysis HI change rated by parents(post-treatment)

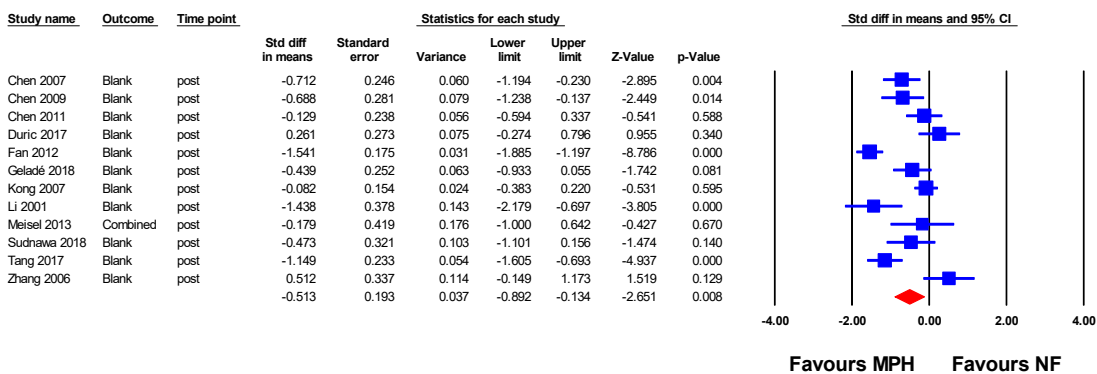

#### Meta Analysis

Suppl. Figure 3-2: HI change rated by parents(post-treatment), SMD: -0.513, CI [-0.892; -0.134], I<sup>2</sup>: 85.702 Egger: p=.661

### Meta Analysis Inattention change rated by parents(post-treatment)

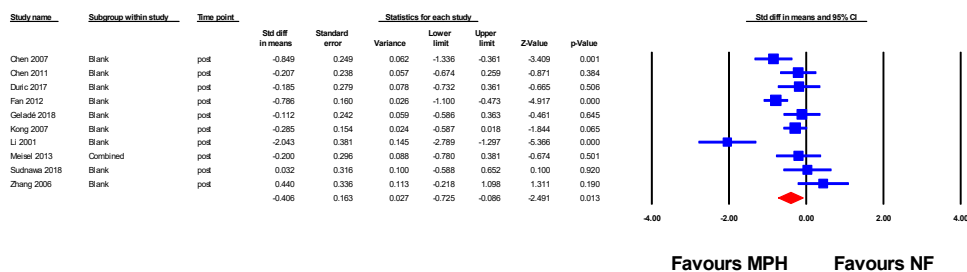

#### Meta Analysis

Suppl. Figure 3-3: Inattention rated by parents(post-treatment), SMD: -0.406, CI [-0.725; 0.086], I<sup>2</sup>: 77.176 Egger: p=.863

## Supplemental Figure 4 Forest plots of Meta analysis (neuropsychological measures, post-treatment)

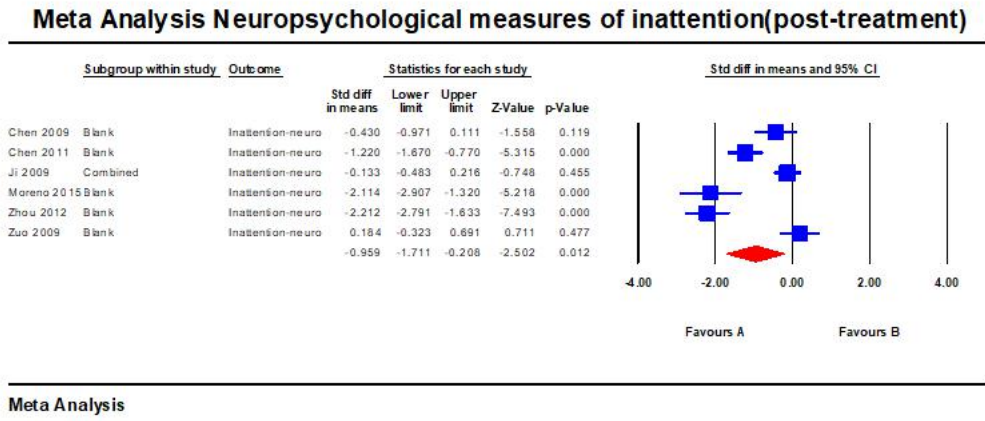

Suppl. Figure 4-1: Neuropsychological measures of inattention change (post-treatment), SMD: -0.959, CI [-1.711; -0.208], I<sup>2</sup>: 92.451 Egger: p=.182

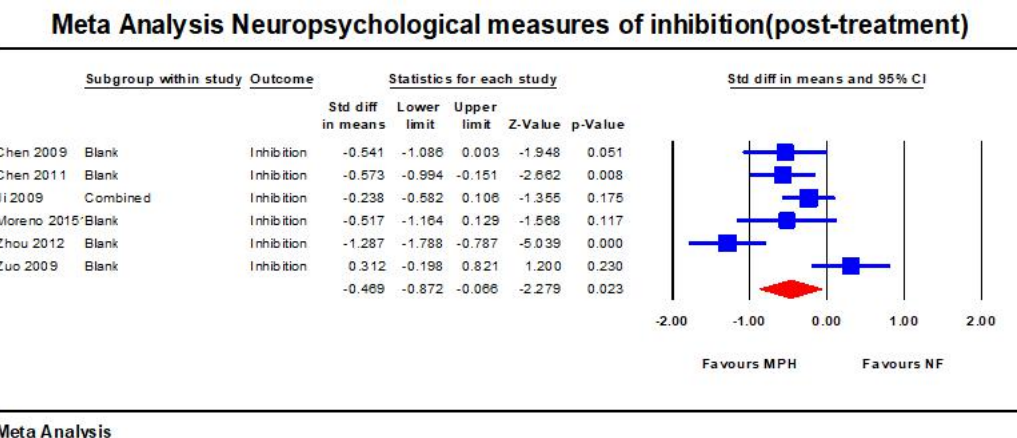

Suppl. Figure 4-2: Neuropsychological measures of inhibition change (post-treatment), SMD: -0.469, CI [-0.872; -0.066], I<sup>2</sup>: 76.484 Egger: p=.709



## Supplemental Material 5 Forest plots of Meta analysis (dropout)

### Meta Analysis dropout (post-treatment)

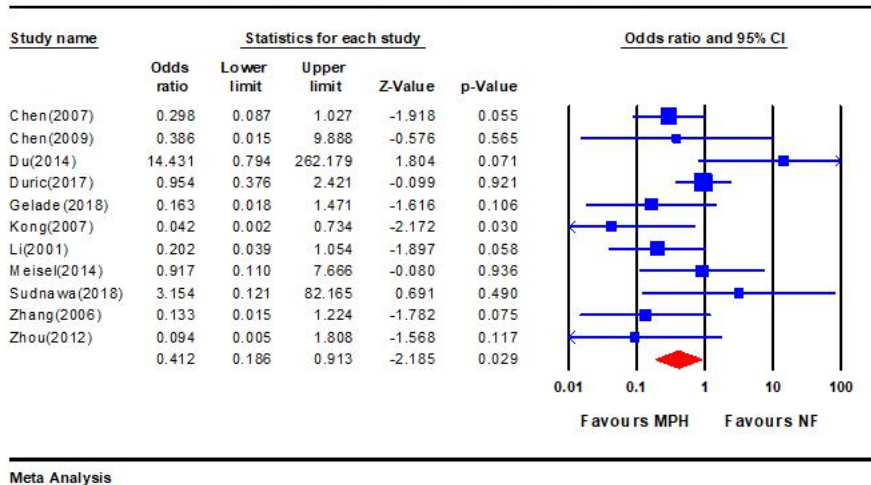

Suppl. Figure 5: Dropout (post-treatment), OR: 0.412, CI [0.186; 0.913],  $I^2=40.495$  Egger:  $p=.621$

## Supplemental Figure 6 Forest plots of Meta analysis (rated by teachers, follow-up)

### Meta Analysis total score rated by teacher(follow-up)

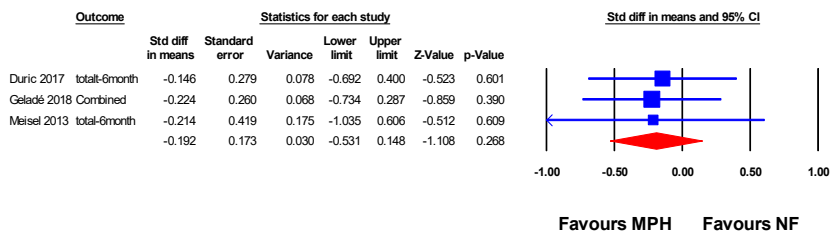

Meta Analysis

Suppl. Figure 6-1: Total score change rated by teacher(follow-up), SMD: -0.192, CI [-0.531; 0.148],  $I^2$ : 0.000 Egger:  $p=0.914$

### Meta Analysis hyperactivity rated by teacher(follow-up)

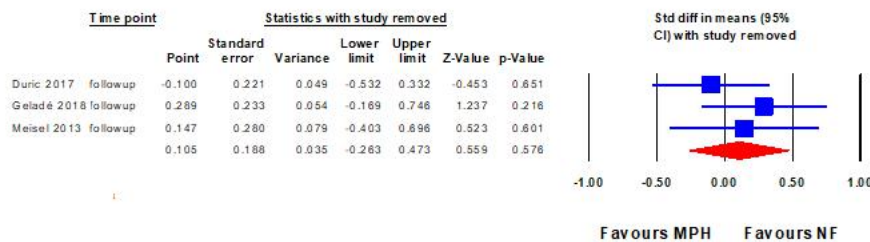

Meta Analysis

Suppl. Figure 6-2: Hyperactivity score change rated by teacher(follow up), SMD: 0.105, CI [-0.263; 0.473],  $I^2$ : 12.565 Egger:  $p=0.475$

### Meta Analysis inattention rated by teacher(follow-up)

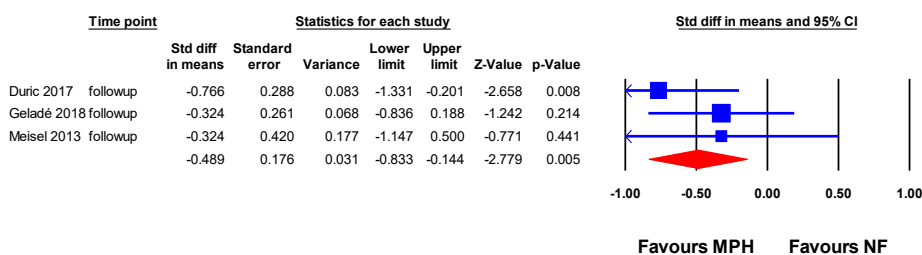

Meta Analysis

Suppl. Figure 6-3: Inattention score change rated by teacher(follow-up), SMD: -0.489, CI [-0.833; -0.144],  $I^2$ : 0.005 Egger:  $p=0.905$

# Supplemental Figure 7 Forest plots of Meta analysis (rated by parents, follow-up)

## Meta Analysis total score change rated by parents(followup)

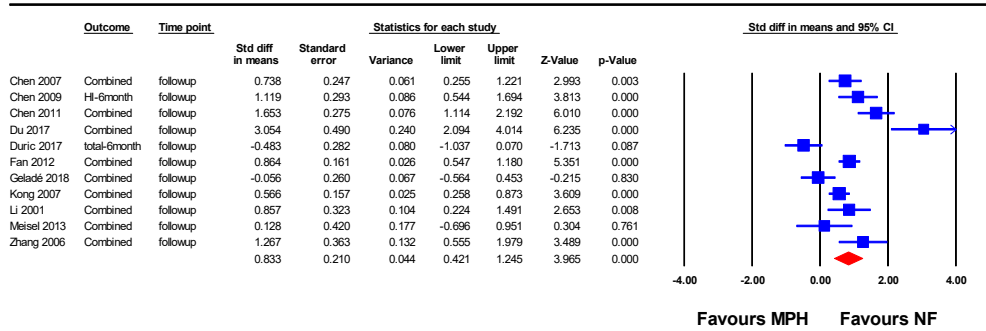

Meta Analysis

Suppl. Figure 7-1: Total score change rated by parents(followup), SMD: 0.833, CI [0.421; 1.245], I<sup>2</sup>: 85.582 Egger: p=.446

## Meta Analysis HI score change rated by parents(followup)

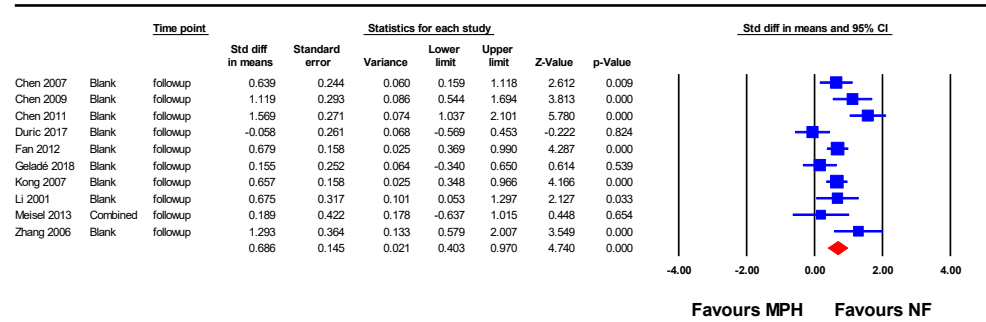

Meta Analysis

Suppl. Figure 7-2: HI change rated by parents(follow-up), SMD: 0.686, CI [0.403; 0.970], I<sup>2</sup>: 69.508 Egger: p=.814

## Meta Analysis Inattention score change rated by parents(followup)

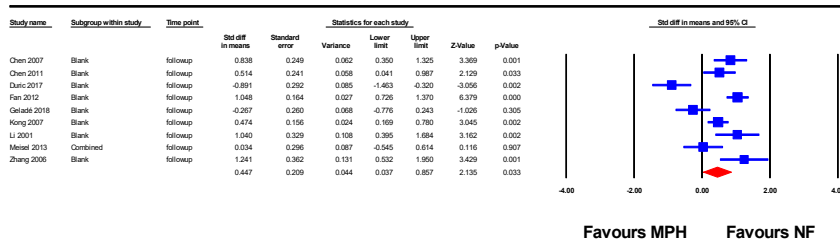

Meta Analysis

Suppl. Figure 7-3: Inattention rated by parents(followup), SMD: 0.447, CI [0.037; 0.857], I<sup>2</sup>: 85.126 Egger: p=.505

## Supplemental Figure 8 Forest plots of Meta analysis (neuropsychological measures, post-treatment)

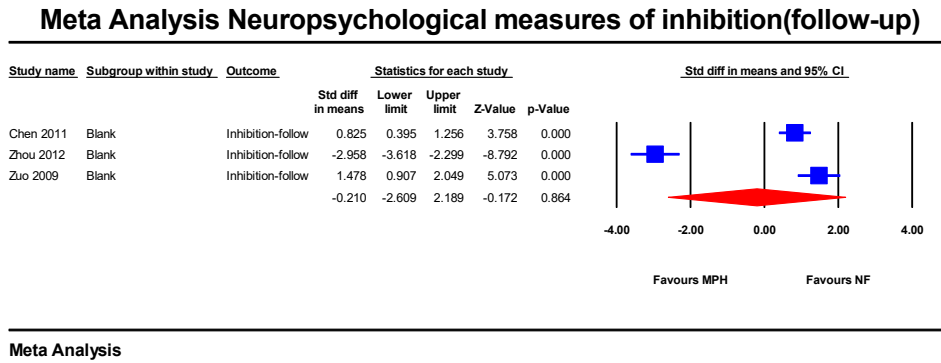

Suppl. Figure 8-1: Neuropsychological measures of inhibition change (follow-up), SMD: -0.210, CI [-2.609; 2.189], I<sup>2</sup>: 98.268 Egger: p=.543

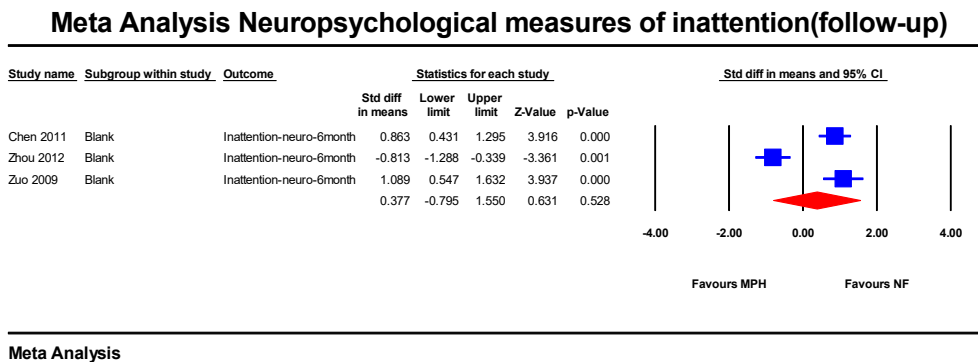

pl. Figure 8-2: Neuropsychological measures of inattention change (follow-up), SMD: 0.377, CI [-0.795; 1.550], I<sup>2</sup>: 94.393 Egger: p=.928

Sup

**Supplemental Table 1. Descriptive table of the studies included in the meta-analysis.**

| First author(year) | NF(standard)) |    |      |          | MPH         |    |       |          |                                 | Treatment time | Foll-up | Assessment instrument  | outcome            | Diagnosis of ADHD | country     | rater |
|--------------------|---------------|----|------|----------|-------------|----|-------|----------|---------------------------------|----------------|---------|------------------------|--------------------|-------------------|-------------|-------|
|                    | Age           | N  | male | Drop out | Age         | N  | male  | Drop out | treatment                       |                |         |                        |                    |                   |             |       |
| Chen (2007)        | 6-13          | 43 | NR   | 4        | 6-13        | 43 | NR    | 11       | 5mg/day                         | 3month         | 2month  | Conner-parent          | HI IA              | DSM-IV            | China       | P     |
| Chen (2009)        | 9.16 ± 2.09   | 25 | 80   | 0        | 9.38 ± 2.16 | 30 | 79.31 | 1        | 18-54mg/day                     | 6 weeks        | 2 month | IV A-CPT IOWA conners  | FRCQ FAQ           | DSM-III-R         | China       | P     |
| Chen (2011)        | 7.6± 1.5      | 45 | 77.8 | NR       | 7.5± 1.7    | 36 | 80    | NR       | 10mg/day, Monday to Friday      | 6month         | 3month  | Conner-parent IVA- CPT | HI IA FRCQ FAQ     | DSM-IV            | China       | P     |
| Du(2014)           | 6-14          | 60 | NR   | 6        | 6-14        | 60 | NR    | 0        | 5mg/day                         | 3-4month       | 6 month | SNAP-IV                | Total score        | DSM-IV            | China       | P     |
| Duric (2017)       | 11.4± 3.1     | 42 | 73   | 12       | 10.9 ± 2.4  | 44 | 87    | 13       | 1mg/kg/day;range:20-60 mg       | 3month         | 6month  | Barkley (teacher)      | TS HI IA           | ICD-10            | Norway      | T/P   |
| Fan(2012)          | 6-13          | 89 | NR   | NR       | 6-13        | 80 | NR    | NR       | 5mg/d-20mg/day                  | 3month         | 3month  | Conner-parent          | HI IA              | DSM-IV            | China       | P     |
| Gelade (2018)      | 9.8± 1.9      | 39 | 72.7 | 1        | 9.0± 1.2    | 36 | 75.0  | 5        | 5-20mg/day                      | 130-12weeks    | 6month  | SWAN                   | HI IA              | DSM-IV            | Netherlands | T/P   |
| Ji(2009)           | 8.75 ± 1.66   | 69 | 76.8 | NR       | 9.19 ± 1.72 | 63 | 76.2  | NR       | >5mg/day                        | 3-4month       | NR      | IVA-CPT                | FRCQ FAQ           | DSM-IV            | China       | NA    |
| Kong (2007)        | 8.6±1.2       | 90 | 75.6 | 0        | 8.4± 1.4    | 90 | 74.4  | 10       | 5mg/day and constantly adjusted | 3month         | 6month  | Conner-parent TOVA1    | HI IA IQ omissions | DSM-IV            | China       | P     |

|                   |                   |    |          |    |                   |        |       |    |                                                                                                       |          |              |                   |                     |               |          |     |
|-------------------|-------------------|----|----------|----|-------------------|--------|-------|----|-------------------------------------------------------------------------------------------------------|----------|--------------|-------------------|---------------------|---------------|----------|-----|
|                   |                   |    |          |    |                   |        |       |    |                                                                                                       |          |              |                   | RT<br>variatio<br>n |               |          |     |
| Li<br>(2001)      | 8-13              | 28 | NR       | 2  | 8-13              | 2<br>9 | NR    | 8  | initial dose<br>5mg/mg and<br>constantly<br>adjusted                                                  | 3-4month | 1—<br>3month | Conner-<br>parent | HI<br>IA            | DSM-<br>III   | China    | P   |
| Meisel<br>(2013)  | 9.5±1<br>.8       | 14 | 50       | 2  | 8.9±<br>1.5       | 1<br>3 | 54.55 | 2  | 1mg/kg/day                                                                                            | 2month   | 2month       | ADHD<br>RS-IV     | TS<br>HI<br>IA      | DSM-<br>IV    | Spain    | T/P |
| Moreno<br>(2015)  | 9.21±<br>1.9      | 19 | 79       | NR | 9.21<br>±2.2      | 1<br>9 | 79    | NR | immediate,<br>intermediate<br>release, or<br>osmotic<br>controlled<br>release oral<br>system,<br>OROS | 20 weeks | NR           | IVA/CPT           | IVA/CP<br>T         | ADHD<br>RS-IV | Spain    | NA  |
| Sudnawa<br>(2018) | 8.4±<br>1.6       | 20 | 90       | 1  | 9.0<br>±<br>1.5   | 2<br>0 | 90    | 0  | 5-20mg/d                                                                                              | 12weeks3 | NR           | VADTRS            | HI<br>IA<br>tT      | NR            | Thailand | T/P |
| Tang(20<br>17)    | 8.64<br>±<br>1.54 | 43 | 55.<br>8 | NR | 8.75<br>±<br>1.51 | 4<br>3 | 53.4  | NR | 5mg/day                                                                                               | 3month   | NR           | Conner-<br>parent | HI<br>IA            | ICD-<br>10    | China    | P   |
| Yang(20<br>16)    | Child             | 63 | NR       | NR | Child             | 6<br>3 | NR    | NR | 5mg/                                                                                                  | 6 month  | NR           | SNAP-IV           | Total<br>score      | DSM-<br>IV    | China    | P   |
| Zhang<br>(2006)   | 6.5-<br>11.9      | 21 | 79.<br>5 | 1  | 6.5-<br>11.9      | 2<br>2 | 79.5  | 6  | 5mg/day                                                                                               | 3-4month | 3month       | Conner-<br>parent | HI<br>IA            | DSM-<br>IV    | China    | P   |
| Zhou<br>(2012)    | 8.4±<br>1.7       | 38 | 78.<br>9 | 0  | 9.1<br>±<br>1.5   | 3<br>6 | 77.8  | 4  | 18-36mg/day                                                                                           | 6 month  | NR           | IVA-CPT           | FRCQ<br>FAQ         | DSM-<br>IV    | China    | NA  |

|           |         |    |    |    |         |    |    |    |                   |        |        |         |             |           |       |    |
|-----------|---------|----|----|----|---------|----|----|----|-------------------|--------|--------|---------|-------------|-----------|-------|----|
| Zuo(2009) | 8.4±2.3 | 30 | NR | NR | 8.4±2.3 | 30 | NR | NR | 0.1-0.61mg/kg/day | 2month | 3month | IVA-CPT | FRCQ<br>FAQ | DSM-III-R | China | NA |
|-----------|---------|----|----|----|---------|----|----|----|-------------------|--------|--------|---------|-------------|-----------|-------|----|

**Supplemental Table 2. Summary of the results rated by teachers**

| Timepoint      | Outcome                    | Type of analysis | N Studies | N Subjects | SMD    | Lower limit | Upper limit | P     | Heterogeneity |    |       |                | Egger's Test publication Bias |       |
|----------------|----------------------------|------------------|-----------|------------|--------|-------------|-------------|-------|---------------|----|-------|----------------|-------------------------------|-------|
|                |                            |                  |           |            |        |             |             |       | Q             | df | p     | I <sup>2</sup> | t                             | p     |
| Post treatment | Total score                |                  | 4         | 228        | -0.578 | -1.063      | -0.092      | 0.020 | 7.14          | 3  | 0.062 | 59.126         | 0.155                         | 0.890 |
|                | Hyperactivity/ impulsivity |                  | 4         | 228        | -0.474 | -0.860      | -0.088      | 0.016 | 4.825         | 3  | 0.156 | 37.818         | 0.311                         | 0.784 |
|                | Inattention                |                  | 4         | 228        | -0.677 | -1.245      | -0.109      | 0.020 | 9.951         | 3  | 0.019 | 69.852         | 0.103                         | 0.927 |
| Follow up      | Total score                |                  | 3         | 198        | -0.192 | -0.531      | 0.148       | 0.268 | 0.045         | 2  | 0.978 | 0.000          | 0.134                         | 0.914 |
|                | Hyperactivity/ impulsivity |                  | 3         | 188        | 0.105  | -0.263      | 0.473       | 0.576 | 2.287         | 2  | 0.319 | 12.565         | 0.078                         | 0.475 |
|                | Inattention                |                  | 3         | 188        | -0.489 | -0.833      | -0.144      | 0.005 | 1.475         | 2  | 0.478 | 0.000          | 0.149                         | 0.905 |

**Supplemental Table 3. Summary of the results rated by parents**

| Timepoint      | Outcome                                                             | Type of analysis    | N Studies | N Subjects | SMD    | Lower limit | Upper limit | P     | Heterogeneity |    |       |                | Egger's Test publication Bias |       |
|----------------|---------------------------------------------------------------------|---------------------|-----------|------------|--------|-------------|-------------|-------|---------------|----|-------|----------------|-------------------------------|-------|
|                |                                                                     |                     |           |            |        |             |             |       | Q             | df | p     | I <sup>2</sup> | t                             | p     |
| Post treatment | ADHD symptoms COMBINED OR inattention OR hyperactivity/ impulsivity | all                 | 14        | 1231       | -0.500 | -0.814      | -0.187      | 0.002 | 69.102        | 13 | 0.000 | 81.187         | 0.428                         | 0.676 |
|                |                                                                     | Conners scales only | 8         | 757        | -0.674 | -1.103      | -0.245      | 0.002 | 49.051        | 7  | 0.000 | 85.729         | 0.221                         | 0.832 |

|                     |                            |                                                                     |            |      |        |        |        |       |        |        |       |        |        |       |       |
|---------------------|----------------------------|---------------------------------------------------------------------|------------|------|--------|--------|--------|-------|--------|--------|-------|--------|--------|-------|-------|
|                     |                            | ICD/DSM only                                                        | 13         | 1191 | -0.493 | -0.827 | -0.160 | 0.004 | 69.068 | 12     | 0.000 | 82.626 | 0.442  | 0.666 |       |
|                     |                            | Funded only                                                         | 5          | 445  | -0.633 | -1.226 | -0.040 | 0.037 | 18.146 | 4      | 0.001 | 77.957 | 0.800  | 0.482 |       |
|                     |                            | >30 only                                                            | 7          | 797  | -0.600 | -0.986 | -0.214 | 0.002 | 35.664 | 4      | 0.000 | 83.176 | 0.045  | 0.965 |       |
|                     | Hyperactivity/ impulsivity | all                                                                 | 12         | 985  | -0.513 | -0.892 | -0.134 | 0.008 | 76.932 | 11     | 0.000 | 85.702 | 0.451  | 0.661 |       |
|                     |                            | Conners scales only                                                 | 8          | 757  | -0.655 | -1.152 | -0.157 | 0.010 | 65.179 | 7      | 0.000 | 89.260 | 0.003  | 0.997 |       |
|                     |                            | ICD/DSM only                                                        | 11         | 945  | -0.516 | -0.923 | -0.108 | 0.013 | 76.856 | 10     | 0.000 | 86.989 | 0.418  | 0.685 |       |
|                     |                            | Funded only                                                         | 4          | 199  | -0.426 | -1.095 | 0.243  | 0.212 | 13.585 | 3      | 0.004 | 77.917 | 0.648  | 0.582 |       |
|                     |                            | >30 only                                                            | 6          | 677  | -0.566 | -1.151 | 0.019  | 0.058 | 59.794 | 5      | 0.000 | 91.638 | 0.244  | 0.818 |       |
|                     | Inattention                | all                                                                 | 10         | 844  | -0.406 | -0.705 | 0.086  | 0.013 | 39.342 | 9      | 0.000 | 77.176 | 0.177  | 0.863 |       |
|                     |                            | Conners scales only                                                 | 6          | 616  | -0.593 | -1.061 | -0.125 | 0.013 | 32.696 | 5      | 0.000 | 84.708 | 0.374  | 0.727 |       |
|                     |                            | ICD/DSM only                                                        | 9          | 804  | -0.449 | -0.788 | -0.110 | 0.007 | 37.269 | 8      | 0.000 | 78.534 | 0.038  | 0.970 |       |
|                     |                            | Funded only                                                         | 4          | 199  | -0.596 | -1.358 | 0.167  | 0.126 | 21.049 | 3      | 0.058 | 85.748 | 2.990  | 0.095 |       |
|                     |                            | >30                                                                 | 5          | 591  | -0.476 | -0.761 | -0.190 | 0.001 | 9.879  | 4      | 0.043 | 59.511 | 0.302  | 0.782 |       |
|                     | Follow up                  | ADHD symptoms COMBINED OR inattention OR hyperactivity/ impulsivity | All        | 11   | 989    | 0.833  | 0.421  | 1.245 | 0.000  | 69.360 | 10    | 0.000  | 85.582 | 0.792 | 0.446 |
|                     |                            |                                                                     | in English | 3    | 198    | -0.187 | -0.528 | 0.154 | 0.283  | 1.921  | 2     | 0.383  | 0.000  | 0.490 | 0.709 |
| in Chinese          |                            |                                                                     | 8          | 791  | 1.158  | 0.771  | 1.545  | 0.000 | 33.181 | 7      | 0.000 | 78.903 | 2.959  | 0.025 |       |
| conners scales only |                            |                                                                     | 7          | 671  | 0.958  | 0.684  | 1.233  | 0.000 | 14.057 | 6      | 0.029 | 57.316 | 1.852  | 0.123 |       |
| ICD/DSM only        |                            |                                                                     | 11         | 989  | 0.833  | 0.421  | 1.245  | 0.000 | 69.360 | 10     | 0.000 | 85.582 | 0.792  | 0.446 |       |



|             |                            |                     |     |        |        |        |       |        |        |       |        |        |       |       |
|-------------|----------------------------|---------------------|-----|--------|--------|--------|-------|--------|--------|-------|--------|--------|-------|-------|
|             |                            | Funded only         | 5   | 289    | 0.649  | -0.334 | 1.633 | 0.196  | 44.329 | 4     | 0.000  | 90.977 | 2.092 | 0.127 |
|             |                            | >30 only            | 5   | 591    | 0.916  | 0.521  | 1.310 | 0.000  | 11.973 | 3     | 0.007  | 74.943 | 1.422 | 0.290 |
|             | Hyperactivity/ impulsivity | all                 | 10  | 859    | 0.686  | 0.403  | 0.970 | 0.000  | 29.516 | 9     | 0.001  | 69.508 | 0.241 | 0.814 |
|             |                            | in English          | 3   | 188    | 0.073  | -0.253 | 0.400 | 0.660  | 0.433  | 2     | 0.805  | 0.000  | 0.430 | 0.741 |
|             |                            | in Chinese          | 7   | 671    | 0.893  | 0.631  | 1.154 | 0.000  | 12.951 | 6     | 0.044  | 53.672 | 1.801 | 0.131 |
|             |                            | conners scales only | 7   | 671    | 0.89   | 0.63   | 1.15  | 0.000  | 12.95  | 6     | 0.044  | 53.67  | 1.801 | 0.131 |
|             |                            | ICD/DSM only        | 10  | 859    | 0.686  | 0.403  | 0.970 | 0.000  | 29.516 | 9     | 0.001  | 69.508 | 0.241 | 0.814 |
|             |                            | Funded only         | 4   | 199    | 0.207  | -0.096 | 0.509 | 0.181  | 3.249  | 3     | 0.355  | 7.675  | 0.586 | 0.617 |
|             |                            | >30                 | 5   | 591    | 0.690  | 0.293  | 1.088 | 0.001  | 18.781 | 4     | 0.001  | 78.702 | 0.155 | 0.886 |
|             | Inattention                | all                 | 9   | 804    | 0.447  | 0.037  | 0.857 | 0.033  | 53.785 | 8     | 0.000  | 85.126 | 0.701 | 0.505 |
|             |                            | in English          | 3   | 188    | -0.373 | -0.889 | 0.143 | 0.157  | 5.224  | 2     | 0.073  | 61.713 | 0.126 | 0.919 |
|             |                            | in Chinese          | 6   | 616    | 0.809  | 0.547  | 1.070 | 0.000  | 10.024 | 5     | 0.075  | 50.118 | 0.879 | 0.428 |
|             |                            | conners scales only | 6   | 616    | 0.809  | 0.547  | 1.070 | 0.000  | 10.024 | 5     | 0.075  | 50.118 | 0.879 | 0.428 |
|             |                            | ICD/DSM only        | 9   | 804    | 0.447  | 0.037  | 0.857 | 0.033  | 53.785 | 8     | 0.000  | 85.126 | 0.701 | 0.505 |
| Funded only |                            | 3                   | 159 | -0.033 | -0.774 | 0.707  | 0.930 | 19.994 | 3      | 0.000 | 84.995 | 1.181  | 0.358 |       |
| >30         |                            | 5                   | 591 | 0.424  | -0.120 | 0.968  | 0.127 | 35.163 | 4      | 0.000 | 88.624 | 1.238  | 0.303 |       |

**Supplemental Table 4. Summary of the results of Neuropsychological measures**

|                | Outcome                                    | Type of analysis | N Studies | N Subjects | SMD    | Lower limit | Upper limit | P     | Heterogeneity |    |       |                | Egger's Test publication Bias |       |
|----------------|--------------------------------------------|------------------|-----------|------------|--------|-------------|-------------|-------|---------------|----|-------|----------------|-------------------------------|-------|
|                |                                            |                  |           |            |        |             |             |       | Q             | df | p     | I <sup>2</sup> | t                             | p     |
| Post-treatment | Neuropsychological measures of inattention | all              | 6         | 440        | -0.959 | -1.711      | -0.208      | 0.012 | 66.237        | 5  | 0.000 | 92.451         | 1.612                         | 0.182 |
|                |                                            | in Chinese       | 5         | 402        | -0.752 | -1.525      | 0.022       | 0.057 | 53.478        | 4  | 0.000 | 92.520         | 0.998                         | 0.391 |
|                |                                            | >30              | 4         | 347        | -0.833 | -1.800      | 0.133       | 0.091 | 52.932        | 3  | 0.000 | 94.332         | 1.058                         | 0.400 |
|                | Neuropsychological measures of inhibition  | all              | 6         | 440        | -0.469 | -0.872      | -0.066      | 0.023 | 21.262        | 5  | 0.001 | 76.484         | 0.399                         | 0.709 |
|                |                                            | in Chinese       | 5         | 402        | -0.462 | -0.930      | 0.007       | 0.053 | 21.204        | 4  | 0.000 | 81.136         | 0.370                         | 0.735 |
|                |                                            | >30              | 4         | 347        | -0.444 | -1.023      | 0.135       | 0.133 | 85.737        | 3  | 0.000 | 85.737         | 0.276                         | 0.807 |
| Followup       | Neuropsychological measures of             | all              | 3         | 224        | 0.377  | -0.795      | 1.550       | 0.528 | 35.670        | 2  | 0.000 | 94.393         | 0.113                         | 0.928 |

|  |                                           |     |   |     |        |        |       |       |         |   |        |        |       |       |
|--|-------------------------------------------|-----|---|-----|--------|--------|-------|-------|---------|---|--------|--------|-------|-------|
|  | inattention                               |     |   |     |        |        |       |       |         |   |        |        |       |       |
|  | Neuropsychological measures of inhibition | all | 3 | 224 | -0.210 | -2.609 | 2.189 | 0.864 | 115.443 | 2 | 0.0008 | 98.268 | 0.870 | 0.543 |

**Supplemental Table 5. Summary of the results of dropout analyses**

| Type of analysis | N Studies | N Subjects | OR    | Lower limit | Upper limit | P     | Heterogeneity |    |       |                | Egger's Test publication Bias |       |
|------------------|-----------|------------|-------|-------------|-------------|-------|---------------|----|-------|----------------|-------------------------------|-------|
|                  |           |            |       |             |             |       | Q             | df | p     | I <sup>2</sup> | t                             | p     |
| dropouts         | 11        | 843        | 0.412 | 0.186       | 0.913       | 0.029 | 16.805        | 10 | 0.079 | 40.495         | 0.511                         | 0.621 |
